# Supplementary material for: Secular Trends in Systemic Sclerosis Mortality in the United States from 1981 to 2020
Source: MDPI journal article supplement (doi:10.3390/ijerph192215088), 2022-11-16
Supplement: s1 [file s1]

Supplementary Figure S1. The columns of cause of death on United State standard death certificate.

| CAUSE OF DEATH (See instructions and examples)                                                                                                                                                                                                                                                                                                       |                                              | Approximate interval:<br>Onset to death |
|------------------------------------------------------------------------------------------------------------------------------------------------------------------------------------------------------------------------------------------------------------------------------------------------------------------------------------------------------|----------------------------------------------|-----------------------------------------|
| 32. <b>PART I.</b> Enter the <u>chain of events</u> --diseases, injuries, or complications--that directly caused the death. DO NOT enter terminal events such as cardiac arrest, respiratory arrest, or ventricular fibrillation without showing the etiology. DO NOT ABBREVIATE. Enter only one cause on a line. Add additional lines if necessary. |                                              |                                         |
| IMMEDIATE CAUSE (Final disease or condition -----> resulting in death)                                                                                                                                                                                                                                                                               | a. _____<br>Due to (or as a consequence of): | _____                                   |
| Sequentially list conditions, if any, leading to the cause listed on line a. Enter the <b>UNDERLYING CAUSE</b> (disease or injury that initiated the events resulting in death) <b>LAST</b>                                                                                                                                                          | b. _____<br>Due to (or as a consequence of): | _____                                   |
|                                                                                                                                                                                                                                                                                                                                                      | c. _____<br>Due to (or as a consequence of): | _____                                   |
|                                                                                                                                                                                                                                                                                                                                                      | d. _____<br>Due to (or as a consequence of): | _____                                   |

Supplementary Table S1. The number of deaths and age-standardized mortality rate (ASMR) based on the underlying cause of death, 1981–2020.

| Age        | (1)1981–1990 |       |      | (2)1991–2000 |       |      | (3)2001–2010 |       |      | (4)2011–2020 |       |      |
|------------|--------------|-------|------|--------------|-------|------|--------------|-------|------|--------------|-------|------|
|            | No           | %     | ASMR |
| Both sexes |              |       |      |              |       |      |              |       |      |              |       |      |
| Overall*   | 8067         | 100.0 | 3.6  | 11379        | 100.0 | 4.3  | 13292        | 100.0 | 4.3  | 11934        | 100.0 | 3.2  |
| 0–44       | 1065         | 13.2  | 0.6  | 1272         | 11.2  | 0.7  | 1261         | 9.5   | 0.7  | 859          | 7.2   | 0.5  |
| 45–64      | 3222         | 39.9  | 7.2  | 4000         | 35.2  | 7.4  | 4973         | 37.4  | 6.7  | 4040         | 33.9  | 4.8  |
| 65–74      | 2316         | 28.7  | 13.6 | 3370         | 29.6  | 18.1 | 3354         | 25.2  | 17.2 | 3401         | 28.5  | 12.2 |
| ≥75        | 1464         | 18.1  | 12.5 | 2737         | 24.1  | 18.1 | 3704         | 27.9  | 20.8 | 3634         | 30.5  | 17.6 |
| Men        |              |       |      |              |       |      |              |       |      |              |       |      |
| Overall*   | 1914         | 100.0 | 1.9  | 2302         | 100.0 | 2.0  | 2604         | 100.0 | 1.8  | 2294         | 100.0 | 1.3  |
| 0–44       | 237          | 12.4  | 0.3  | 296          | 12.9  | 0.3  | 329          | 12.6  | 0.3  | 222          | 9.7   | 0.2  |
| 45–64      | 866          | 45.2  | 4.0  | 956          | 41.5  | 3.6  | 1260         | 48.4  | 3.5  | 974          | 42.5  | 2.4  |
| 65–74      | 539          | 28.2  | 7.3  | 633          | 27.5  | 7.6  | 586          | 22.5  | 6.5  | 656          | 28.6  | 5.0  |
| ≥75        | 272          | 14.2  | 6.6  | 417          | 18.1  | 7.7  | 429          | 16.5  | 6.3  | 442          | 19.3  | 5.2  |
| Women      |              |       |      |              |       |      |              |       |      |              |       |      |
| Overall*   | 6153         | 100.0 | 5.0  | 9077         | 100.0 | 6.3  | 10688        | 100.0 | 6.3  | 9640         | 100.0 | 4.8  |
| 0–44       | 828          | 13.5  | 1.0  | 976          | 10.8  | 1.1  | 932          | 8.7   | 1.0  | 637          | 6.6   | 0.7  |
| 45–64      | 2356         | 38.3  | 10.0 | 3044         | 33.5  | 10.9 | 3713         | 34.7  | 9.8  | 3066         | 31.8  | 7.2  |
| 65–74      | 1777         | 28.9  | 18.5 | 2737         | 30.2  | 26.5 | 2768         | 25.9  | 26.3 | 2745         | 28.5  | 18.5 |
| ≥75        | 1192         | 19.4  | 15.7 | 2320         | 25.6  | 24.0 | 3275         | 30.6  | 29.8 | 3192         | 33.1  | 26.0 |

\*Mortality rate was age-adjusted using the United States population in 2000 as standard population.

Supplementary Table S2. The number of deaths and age-standardized mortality rate (ASMR) based on the multiple causes of death, 1981–2020.

| Age        | (1)1981–1990 |       |      | (2)1991–2000 |       |      | (3)2001–2010 |       |      | (4)2011–2020 |       |      |
|------------|--------------|-------|------|--------------|-------|------|--------------|-------|------|--------------|-------|------|
|            | No           | %     | ASMR |
| Both sexes |              |       |      |              |       |      |              |       |      |              |       |      |
| Overall*   | 12896        | 100.0 | 5.8  | 17665        | 100.0 | 6.7  | 18733        | 100.0 | 6.0  | 16965        | 100.0 | 4.5  |
| 0–44       | 1411         | 10.9  | 0.9  | 1695         | 9.6   | 0.9  | 1587         | 8.5   | 0.9  | 1106         | 6.5   | 0.6  |
| 45–64      | 4899         | 38.0  | 10.9 | 5786         | 32.8  | 10.7 | 6647         | 35.5  | 9.0  | 5572         | 32.8  | 6.7  |
| 65–74      | 3863         | 30.0  | 22.7 | 5312         | 30.1  | 28.6 | 4826         | 25.8  | 24.7 | 4835         | 28.5  | 17.4 |
| ≥75        | 2723         | 21.1  | 23.2 | 4872         | 27.6  | 32.2 | 5673         | 30.3  | 31.9 | 5452         | 32.1  | 26.3 |
| Men        |              |       |      |              |       |      |              |       |      |              |       |      |
| Overall*   | 3025         | 100.0 | 3.1  | 3547         | 100.0 | 3.1  | 3624         | 100.0 | 2.5  | 3229         | 100.0 | 1.9  |
| 0–44       | 323          | 10.7  | 0.4  | 402          | 11.3  | 0.4  | 413          | 11.4  | 0.4  | 290          | 9.0   | 0.3  |
| 45–64      | 1315         | 43.5  | 6.1  | 1344         | 37.9  | 5.1  | 1666         | 46.0  | 4.6  | 1366         | 42.3  | 3.4  |
| 65–74      | 897          | 29.7  | 12.1 | 1042         | 29.4  | 12.6 | 851          | 23.5  | 9.5  | 914          | 28.3  | 7.0  |
| ≥75        | 490          | 16.2  | 11.9 | 759          | 21.4  | 13.9 | 694          | 19.2  | 10.2 | 659          | 20.4  | 7.8  |
| Women      |              |       |      |              |       |      |              |       |      |              |       |      |
| Overall*   | 9871         | 100.0 | 8.0  | 14118        | 100.0 | 9.7  | 15109        | 100.0 | 8.9  | 13736        | 100.0 | 6.8  |
| 0–44       | 1088         | 11.0  | 1.3  | 1293         | 9.2   | 1.5  | 1174         | 7.8   | 1.3  | 816          | 5.9   | 0.9  |
| 45–64      | 3584         | 36.3  | 15.3 | 4442         | 31.5  | 15.9 | 4981         | 33.0  | 13.2 | 4206         | 30.6  | 9.8  |
| 65–74      | 2966         | 30.0  | 30.9 | 4270         | 30.2  | 41.4 | 3975         | 26.3  | 37.7 | 3921         | 28.5  | 26.4 |
| ≥75        | 2233         | 22.6  | 29.4 | 4113         | 29.1  | 42.5 | 4979         | 33.0  | 45.2 | 4793         | 34.9  | 39.0 |

\*Mortality rate was age-adjusted using the United States population in 2000 as standard population.

Supplementary Table S3. Annual percent changes (APC) in age-standardized mortality rate of systemic sclerosis according to joinpoint analysis based on the underlying cause of death (UCD) and multiple causes of death (MCD) data, 1981–2020.

| Age        | Trend 1   |      |          | Trend 2   |      |          | Trend 3   |      |          | Trend 4   |      |          |
|------------|-----------|------|----------|-----------|------|----------|-----------|------|----------|-----------|------|----------|
|            | Year      | APC  | <i>p</i> |
| UCD, men   |           |      |          |           |      |          |           |      |          |           |      |          |
| Overall    | 1981–2002 | 0.4  | 0.133    | 2002–2020 | –3.3 | <0.001   |           |      |          |           |      |          |
| 0–44       | 1981–2002 | 1.7  | 0.019    | 2002–2020 | –3.5 | <0.001   |           |      |          |           |      |          |
| 45–64      | 1981–2005 | –0.4 | 0.251    | 2005–2020 | –4.3 | <0.001   |           |      |          |           |      |          |
| 65–74      | 1981–2000 | 0.8  | 0.245    | 2000–2020 | –3   | <0.001   |           |      |          |           |      |          |
| ≥75        | 1981–1995 | 2.7  | 0.053    | 1995–2020 | –2.2 | <0.001   |           |      |          |           |      |          |
| UCD, women |           |      |          |           |      |          |           |      |          |           |      |          |
| Overall    | 1981–1986 | –0.9 | 0.471    | 1986–1999 | 3.1  | <0.001   | 1999–2013 | –1.9 | <0.001   | 2013–2020 | –4.4 | <0.001   |
| 0–44       | 1981–2001 | 1    | 0.018    | 2001–2020 | –3.6 | <0.001   |           |      |          |           |      |          |
| 45–64      | 1981–1986 | –4   | 0.036    | 1986–1997 | 2.1  | 0.002    | 1997–2007 | –1.6 | 0.014    | 2007–2020 | –3.8 | <0.001   |
| 65–74      | 1981–2000 | 3.8  | <0.001   | 2000–2020 | –3.3 | <0.001   |           |      |          |           |      |          |
| ≥75        | 1981–2001 | 4.5  | <0.001   | 2001–2013 | –0.4 | 0.493    | 2013–2020 | –3.4 | 0.004    |           |      |          |
| MCD, men   |           |      |          |           |      |          |           |      |          |           |      |          |
| Overall    | 1981–2000 | –0.1 | 0.687    | 2000–2020 | –3.2 | <0.001   |           |      |          |           |      |          |
| 0–44       | 1981–2002 | 1.3  | 0.051    | 2002–2020 | –3.5 | <0.001   |           |      |          |           |      |          |
| 45–64      | 1981–2004 | –1.1 | <0.001   | 2004–2020 | –3.3 | <0.001   |           |      |          |           |      |          |
| 65–74      | 1981–1997 | 0.7  | 0.367    | 1997–2020 | –3.2 | <0.001   |           |      |          |           |      |          |
| ≥75        | 1981–1993 | 3.3  | 0.01     | 1993–2020 | –2.9 | <0.001   |           |      |          |           |      |          |
| MCD, women |           |      |          |           |      |          |           |      |          |           |      |          |
| Overall    | 1981–1999 | 2.1  | <0.001   | 1999–2020 | –2.6 | <0.001   |           |      |          |           |      |          |
| 0–44       | 1981–2000 | 1.1  | 0.011    | 2000–2020 | –3.5 | <0.001   |           |      |          |           |      |          |
| 45–64      | 1981–1998 | 0.5  | 0.041    | 1998–2020 | –2.9 | <0.001   |           |      |          |           |      |          |
| 65–74      | 1981–1999 | 3.1  | <0.001   | 1999–2020 | –3.3 | <0.001   |           |      |          |           |      |          |
| ≥75        | 1981–1999 | 4    | <0.001   | 1999–2020 | –1.3 | <0.001   |           |      |          |           |      |          |

Supplementary Table S4. The 5-year mortality rate per age group of 5 years. (A) underlying cause of death, (B) multiple causes of death.

(A)

| Age   | Period    |           |           |           |           |           |           |           |
|-------|-----------|-----------|-----------|-----------|-----------|-----------|-----------|-----------|
|       | 1980–1984 | 1985–1989 | 1990–1994 | 1995–1999 | 2000–2004 | 2005–2009 | 2010–2014 | 2015–2019 |
| 20–24 | 0.3       | 0.3       | 0.3       | 0.3       | 0.4       | 0.3       | 0.3       | 0.2       |
| 25–29 | 0.6       | 0.6       | 0.5       | 0.6       | 0.6       | 0.6       | 0.4       | 0.4       |
| 30–34 | 1.1       | 0.8       | 0.8       | 0.8       | 0.8       | 0.8       | 0.8       | 0.6       |
| 35–39 | 1.7       | 1.3       | 1.6       | 1.5       | 1.7       | 1.4       | 1.1       | 1.1       |
| 40–44 | 2.8       | 2.9       | 2.4       | 2.5       | 2.9       | 2.6       | 1.8       | 1.5       |
| 45–49 | 4.5       | 3.8       | 4.0       | 4.5       | 4.1       | 3.8       | 2.8       | 2.4       |
| 50–54 | 5.9       | 5.6       | 5.8       | 6.6       | 6.0       | 5.6       | 4.7       | 3.7       |
| 55–59 | 8.7       | 7.6       | 8.7       | 9.1       | 8.6       | 8.0       | 6.0       | 4.9       |
| 60–64 | 11.1      | 10.7      | 11.7      | 13.4      | 13.4      | 10.7      | 9.3       | 6.9       |
| 65–69 | 12.2      | 13.0      | 14.8      | 17.0      | 16.3      | 14.8      | 12.7      | 9.9       |
| 70–74 | 12.9      | 15.0      | 18.6      | 20.9      | 21.8      | 18.7      | 16.7      | 13.8      |
| 75–79 | 12.4      | 16.7      | 18.2      | 20.5      | 23.6      | 23.0      | 20.5      | 17.0      |
| 80–84 | 9.3       | 12.5      | 14.7      | 20.7      | 23.6      | 22.1      | 21.0      | 18.9      |
| ≥85   | 6.3       | 7.7       | 11.5      | 13.8      | 14.3      | 16.3      | 16.5      | 14.8      |

(B)

| Age   | Period    |           |           |           |           |           |           |           |
|-------|-----------|-----------|-----------|-----------|-----------|-----------|-----------|-----------|
|       | 1980–1984 | 1985–1989 | 1990–1994 | 1995–1999 | 2000–2004 | 2005–2009 | 2010–2014 | 2015–2019 |
| 20–24 | 0.4       | 0.4       | 0.4       | 0.3       | 0.5       | 0.3       | 0.3       | 0.2       |
| 25–29 | 0.7       | 0.7       | 0.6       | 0.8       | 0.8       | 0.7       | 0.6       | 0.5       |
| 30–34 | 1.3       | 1.1       | 1.1       | 1.2       | 1.0       | 1.1       | 1.0       | 0.8       |
| 35–39 | 2.2       | 1.7       | 2.0       | 2.0       | 2.1       | 1.7       | 1.4       | 1.3       |
| 40–44 | 3.8       | 4.1       | 3.5       | 3.5       | 3.8       | 3.2       | 2.3       | 2.0       |
| 45–49 | 6.1       | 5.4       | 5.4       | 6.1       | 5.3       | 5.2       | 3.7       | 3.2       |
| 50–54 | 8.2       | 8.5       | 8.7       | 9.1       | 8.2       | 7.0       | 6.0       | 5.2       |
| 55–59 | 13.5      | 12.0      | 13.3      | 13.1      | 12.3      | 10.4      | 8.3       | 7.0       |
| 60–64 | 17.0      | 17.8      | 18.2      | 19.8      | 18.7      | 14.2      | 12.2      | 10.0      |
| 65–69 | 19.9      | 21.7      | 24.4      | 25.7      | 24.0      | 20.3      | 16.9      | 14.0      |
| 70–74 | 21.8      | 25.7      | 29.7      | 33.3      | 32.7      | 26.8      | 24.2      | 19.6      |
| 75–79 | 22.4      | 28.7      | 32.1      | 34.8      | 36.3      | 34.0      | 28.4      | 24.1      |
| 80–84 | 19.5      | 24.1      | 28.9      | 37.2      | 36.8      | 33.7      | 30.8      | 28.2      |
| ≥85   | 14.1      | 16.4      | 22.6      | 27.0      | 24.4      | 25.3      | 26.7      | 24.3      |
